# Supplementary material for: Magnetic resonance imaging quantification and biodistribution of magnetic nanoparticles usingT1-enhanced contrast
Source: Royal Society of Chemistry journal article supplement (doi:10.1039/c7tb03129g), 2018-01-01
Supplement: c7tb03129g1.pdf [file c7tb03129g1.pdf]

## Supplementary Information

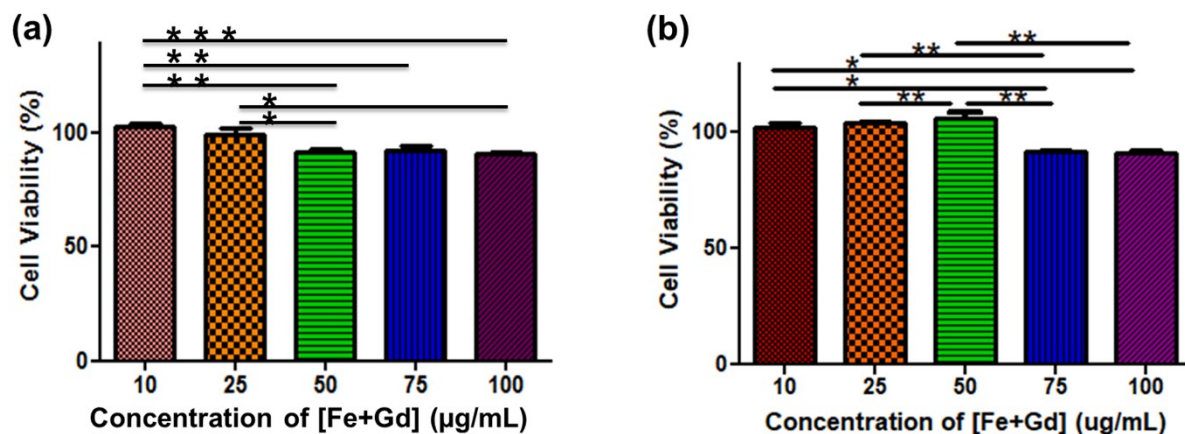

**Figure S1.** Cell viability of 4 nm GdIONPs obtained from cultured MCF-7 and NIH3T3 cells using standard CCK-8 colorimetric assays.. Error bars = SEM; \* $p < 0.05$ ; \*\* $p < 0.01$ ; \*\*\* $p < 0.001$ .

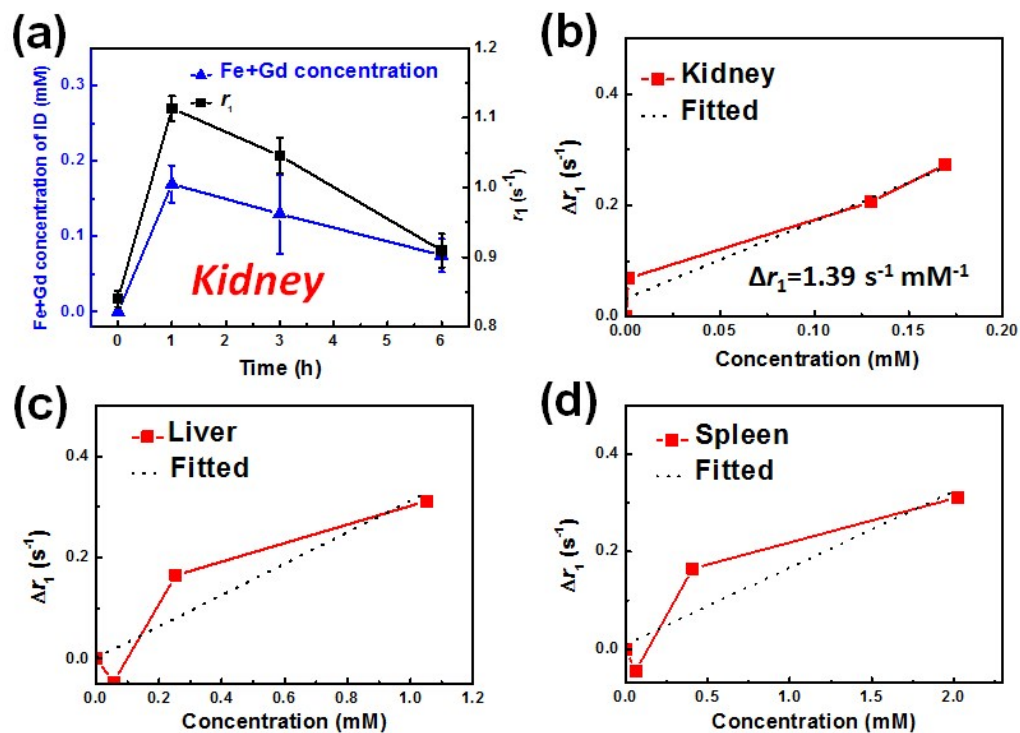

**Figure S2.** (a) (Fe+Gd) concentration (ID) and  $r_1$  with regards to time in kidney. (b) Linear relationship of (Fe+Gd) concentration (ID) and  $\Delta r_1$  in kidney. Relationship of (Fe+Gd) concentration (ID) versus  $\Delta r_1$  in (c) liver and (d) spleen. ID means injected dose of GdIONPs.  $n=3$ . Error bar=SEM.
